# Supplementary material for: Establishing a Urine-Based Biomarker Assay for Prostate Cancer Risk Stratification
Source: PubMed Central journal article supplement (PMC7758396; doi:10.3389/fcell.2020.597961), 2020-12-10

## Supplementary Material

**Supplementary Figure 1.** Box plots of genes with statistically insignificant differential gene expression in the prospective PCa urine cohort (n=202). Box plot of expression of *CDK1* (A), *EZH2* (B), *PCA3* (C), *ANXA3* (D), and *GSTP1* (E). Normalized mRNA level -Cts is defined as  $-\text{Ct}(\text{sample})/\text{Ct}(\text{actin}) * 1000$ .

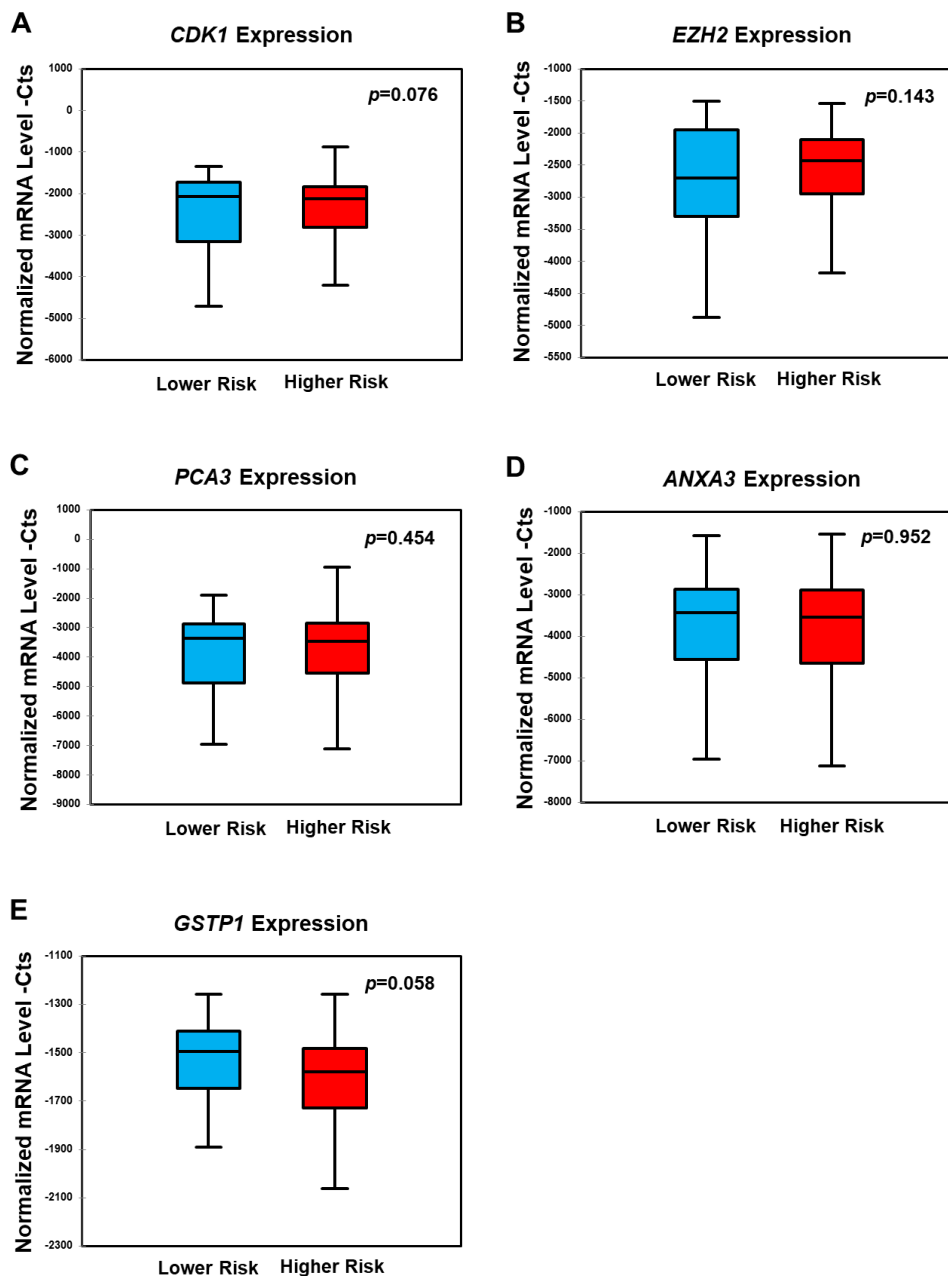

Supplement: Data_Sheet_1.pdf [file Data_Sheet_1.pdf]
